# Supplementary material for: Temporal Trends in Racial and Ethnic Disparities in Endovascular Therapy in Acute Ischemic Stroke
Source: PubMed Central journal article supplement — J Am Heart Assoc. 2022 Mar 1;11(6):e023212. doi: 10.1161/JAHA.121.023212 (PMC9075329; doi:10.1161/jaha.121.023212), 2022-03-01
Supplement: JAH3-11-e023212-s001.pdf [file JAH3-11-e023212-s001.pdf]

# **SUPPLEMENTAL MATERIAL**

**Table S1 Patient and hospital characteristics in stroke patients eligible for EVT:**

| Variable                                         | Overall<br>N=302,965 | EVT<br>N=42,422 | No EVT<br>N=260,543 | P Value | % Std.<br>Diff. |
|--------------------------------------------------|----------------------|-----------------|---------------------|---------|-----------------|
| <b>Patient Demographics</b>                      |                      |                 |                     |         |                 |
| Age*                                             | 75 (63 - 85)         | 72 (61 - 81)    | 76 (63 - 85)        | <.0001  | 24.6            |
| Female                                           | 163,951 (54.1)       | 21,634 (51.0)   | 142,317 (54.6)      | <.0001  | 7.3             |
| Race/Ethnicity                                   |                      |                 |                     | <.0001  | 10.2            |
| ' White                                          | 211,349 (69.8)       | 29,429 (69.4)   | 181,920 (69.8)      |         |                 |
| ' Black                                          | 48,532 (16.0)        | 6,214 (14.6)    | 42,318 (16.2)       |         |                 |
| ' Hispanic (any race)                            | 21,503 (7.1)         | 2,887 (6.8)     | 18,616 (7.1)        |         |                 |
| ' Asian                                          | 8,631 (2.8)          | 1,342 (3.2)     | 7,289 (2.8)         |         |                 |
| ' Other (includes UTD)                           | 12,950 (4.3)         | 2,550 (6.0)     | 10,400 (4.0)        |         |                 |
| Health Insurance Status                          |                      |                 |                     | <.0001  | 20.6            |
| ' Private/VA/Champus/Other Insurance             | 106,551 (35.2)       | 16,904 (39.8)   | 89,647 (34.4)       |         |                 |
| ' Medicaid                                       | 30,873 (10.2)        | 4,091 (9.6)     | 26,782 (10.3)       |         |                 |
| ' Medicare                                       | 105,985 (35.0)       | 15,094 (35.6)   | 90,891 (34.9)       |         |                 |
| ' Self Pay/No Insurance                          | 11,330 (3.7)         | 1,946 (4.6)     | 9,384 (3.6)         |         |                 |
| <b>Medical History</b>                           |                      |                 |                     |         |                 |
| Atrial Fibrillation/Flutter                      | 88,274 (29.1)        | 15,066 (35.5)   | 73,208 (28.1)       | <.0001  | 16.0            |
| Prosthetic Heart Valve                           | 4,559 (1.5)          | 916 (2.2)       | 3,643 (1.4)         | <.0001  | 5.8             |
| Previous Stroke/TIA                              | 101,855 (33.6)       | 9,078 (21.4)    | 92,777 (35.6)       | <.0001  | 31.9            |
| CAD/Prior MI                                     | 79,455 (26.2)        | 10,134 (23.9)   | 69,321 (26.6)       | <.0001  | 6.3             |
| Carotid Stenosis                                 | 9,927 (3.3)          | 1,079 (2.5)     | 8,848 (3.4)         | <.0001  | 5.0             |
| Diabetes Mellitus                                | 93,480 (30.9)        | 10,556 (24.9)   | 82,924 (31.8)       | <.0001  | 15.5            |
| Peripheral Vascular Disease (PVD)                | 13,443 (4.4)         | 1,556 (3.7)     | 11,887 (4.6)        | <.0001  | 4.5             |
| Hypertension                                     | 232,053 (76.6)       | 30,110 (71.0)   | 201,943 (77.5)      | <.0001  | 15.0            |
| Smoker                                           | 46,496 (15.3)        | 6,983 (16.5)    | 39,513 (15.2)       | <.0001  | 3.6             |
| Dyslipidemia                                     | 137,991 (45.5)       | 17,879 (42.1)   | 120,112 (46.1)      | <.0001  | 8.0             |
| Heart Failure                                    | 39,749 (13.1)        | 5,664 (13.4)    | 34,085 (13.1)       | 0.1277  | 0.8             |
| Chronic Renal Insufficiency                      | 25,398 (8.4)         | 2,787 (6.6)     | 22,611 (8.7)        | <.0001  | 8.0             |
| Ambulatory status prior to the current event     |                      |                 |                     | <.0001  | 32.1            |
| ' Able to ambulate independently                 | 186,033 (86.8)       | 30,193 (94.8)   | 155,840 (85.3)      |         |                 |
| ' With assistance (from person)                  | 16,347 (7.6)         | 1,027 (3.2)     | 15,320 (8.4)        |         |                 |
| ' Unable to ambulate                             | 12,059 (5.6)         | 627 (2.0)       | 11,432 (6.3)        |         |                 |
| <b>Arrival Information</b>                       |                      |                 |                     |         |                 |
| Ambulatory status on Admission                   |                      |                 |                     | <.0001  | 33.3            |
| ' Able to ambulate independently                 | 23,189 (14.3)        | 2,007 (8.8)     | 21,182 (15.2)       |         |                 |
| ' With assistance (from person)                  | 38,032 (23.5)        | 3,602 (15.8)    | 34,430 (24.7)       |         |                 |
| ' Unable to ambulate                             | 100,925 (62.2)       | 17,178 (75.4)   | 83,747 (60.1)       |         |                 |
| Patient location when stroke symptoms discovered |                      |                 |                     | <.0001  | 29.8            |
| ' Not in a healthcare setting                    | 263,416 (87.6)       | 38,659 (91.9)   | 224,757 (86.9)      |         |                 |
| ' Another acute care facility                    | 5,239 (1.7)          | 1,494 (3.6)     | 3,745 (1.4)         |         |                 |
| ' Chronic health care facility                   | 28,561 (9.5)         | 1,542 (3.7)     | 27,019 (10.4)       |         |                 |
| ' Outpatient healthcare setting                  | 3,615 (1.2)          | 384 (0.9)       | 3,231 (1.2)         |         |                 |
| Arrival Mode: EMS                                | 212,872 (71.5)       | 24,114 (56.9)   | 188,758 (73.9)      | <.0001  | 36.3            |
| Onset to Arrival Times, min*                     | 99 (51 - 200)        | 130 (56 - 215)  | 95 (50 - 196)       | <.0001  | 16.6            |

| Variable                                                 | Overall<br>N=302,965 | EVT<br>N=42,422 | No EVT<br>N=260,543 | P Value | % Std.<br>Diff. |
|----------------------------------------------------------|----------------------|-----------------|---------------------|---------|-----------------|
| Onset to Arrival Times, min, categories                  |                      |                 |                     | <.0001  |                 |
| ' <31                                                    | 26,170 (8.6)         | 2,989 (7.0)     | 23,181 (8.9)        |         |                 |
| ' >=31 and <61                                           | 72,188 (23.8)        | 8,728 (20.6)    | 63,460 (24.4)       |         |                 |
| ' >=61 and <91                                           | 44,199 (14.6)        | 4,966 (11.7)    | 39,233 (15.1)       |         |                 |
| ' >=91 and <121                                          | 29,109 (9.6)         | 3,467 (8.2)     | 25,642 (9.8)        |         |                 |
| ' >=121 and <181                                         | 43,690 (14.4)        | 7,524 (17.7)    | 36,166 (13.9)       |         |                 |
| ' >=181 and <241                                         | 36,231 (12.0)        | 6,975 (16.4)    | 29,256 (11.2)       |         |                 |
| ' >=241                                                  | 51,378 (17.0)        | 7,773 (18.3)    | 43,605 (16.7)       |         |                 |
| Off-Hour Arrival (Regular Hour: 7A-6P, M-F, non-holiday) | 175,004 (57.8)       | 23,878 (56.3)   | 151,126 (58.0)      | <.0001  | 3.5             |
| Initial NIHSS Score (0-42)*                              | 13 (8 - 19)          | 18 (13 - 22)    | 12 (8 - 18)         | <.0001  | 66.4            |
| <b>Measurements</b>                                      |                      |                 |                     |         |                 |
| Heart Rate (30-200), bpm*                                | 80 (70 - 93)         | 80 (70 - 93)    | 80 (70 - 93)        | 0.0569  | 0.1             |
| SBP (50-250), mm Hg*                                     | 153 (135 - 174)      | 148 (131 - 168) | 154 (136 - 176)     | <.0001  | 20.7            |
| DBP (20-200), mm Hg*                                     | 83 (72 - 96)         | 82 (71 - 95)    | 84 (72 - 96)        | <.0001  | 6.2             |
| BMI*                                                     | 27 (24 - 32)         | 28 (24 - 32)    | 27 (23 - 32)        | <.0001  | 11.8            |
| <b>Medications Prior to Admission</b>                    |                      |                 |                     |         |                 |
| Antiplatelets                                            | 136,196 (51.1)       | 15,828 (42.7)   | 120,368 (52.5)      | <.0001  | 19.7            |
| Anticoagulants                                           | 42,308 (23.3)        | 8,006 (26.7)    | 34,302 (22.6)       | <.0001  | 9.5             |
| Antihypertensives                                        | 177,098 (70.3)       | 24,057 (64.0)   | 153,041 (71.4)      | <.0001  | 15.9            |
| Cholesterol-Reducers                                     | 138,611 (45.9)       | 17,245 (40.7)   | 121,366 (46.7)      | <.0001  | 12.2            |
| Diabetic Medications                                     | 55,670 (23.3)        | 6,268 (17.6)    | 49,402 (24.2)       | <.0001  | 16.3            |
| <b>Initial exam findings</b>                             |                      |                 |                     |         |                 |
| Weakness/Paresis                                         | 181,828 (89.5)       | 27,386 (93.1)   | 154,442 (88.9)      | <.0001  | 14.8            |
| Altered Level of Consciousness                           | 70,691 (34.8)        | 11,528 (39.2)   | 59,163 (34.1)       | <.0001  | 10.7            |
| Aphasia                                                  | 147,077 (72.4)       | 22,785 (77.5)   | 124,292 (71.6)      | <.0001  | 13.6            |
| Other neurological signs/symptoms                        | 75,506 (37.2)        | 13,026 (44.3)   | 62,480 (36.0)       | <.0001  | 17.0            |
| No neurological signs/symptoms                           | 199 (0.1)            | 10 (0.0)        | 189 (0.1)           | 0.0001  | 2.8             |
| ND                                                       | 659 (0.3)            | 122 (0.4)       | 537 (0.3)           | 0.0032  | 1.8             |
| <b>Received IV t-PA</b>                                  |                      |                 |                     |         |                 |
| IV t-PA initiated at this hospital                       | 131,214 (43.3)       | 16,969 (40.0)   | 114,245 (43.9)      | <.0001  | 7.8             |
| IV t-PA at an outside hospital                           | 33,979 (21.0)        | 10,731 (37.3)   | 23,248 (17.4)       | <.0001  | 45.8            |
| IV t-PA at this hospital or at an outside hospital       | 164,827 (54.42)      | 27,593 (65.05)  | 137,234 (52.69)     | <.0001  | 25.3            |
| <b>Hospital Characteristics</b>                          |                      |                 |                     |         |                 |
| Number of Beds*                                          | 411 (270 - 639)      | 557 (393 - 773) | 385 (256 - 607)     | <.0001  | 63.3            |
| Rural Location                                           | 7,917 (2.6)          | 138 (0.3)       | 7,779 (3.0)         | <.0001  | 21.0            |
| Stroke Center Status                                     |                      |                 |                     | <.0001  | 53.7            |
| ' Comprehensive Stroke Center (CSC)                      | 67,204 (22.2)        | 17,893 (42.2)   | 49,311 (18.9)       |         |                 |
| ' Primary Stroke Center (PSC)                            | 166,229 (54.9)       | 18,756 (44.2)   | 147,473 (56.6)      |         |                 |
| ' Neither CSC or PSC                                     | 69,532 (23.0)        | 5,773 (13.6)    | 63,759 (24.5)       |         |                 |
| Academic Hospital                                        | 241,525 (79.7)       | 38,848 (91.6)   | 202,677 (77.8)      | <.0001  | 39.0            |
| Region                                                   |                      |                 |                     | <.0001  | 3.9             |
| ' Northeast                                              | 63,849 (21.1)        | 8,887 (20.9)    | 54,962 (21.1)       |         |                 |
| ' Midwest                                                | 59,459 (19.6)        | 8,851 (20.9)    | 50,608 (19.4)       |         |                 |
| ' South                                                  | 120,002 (39.6)       | 16,680 (39.3)   | 103,322 (39.7)      |         |                 |
| ' West                                                   | 59,655 (19.7)        | 8,004 (18.9)    | 51,651 (19.8)       |         |                 |

| <b>Variable</b>                 | <b>Overall<br/>N=302,965</b> | <b>EVT<br/>N=42,422</b> | <b>No EVT<br/>N=260,543</b> | <b>P Value</b> | <b>% Std.<br/>Diff.</b> |
|---------------------------------|------------------------------|-------------------------|-----------------------------|----------------|-------------------------|
| Annual Volume of IS Admissions* | 290 (198 - 439)              | 388 (276 - 528)         | 272 (188 - 413)             | <.0001         | 63.3                    |
| Annual Volume of IV t-PA*       | 31 (19 - 44)                 | 39 (28 - 53)            | 29 (18 - 42)                | <.0001         | 56.5                    |
| Annual Volume of EVT*           | 35 (0 - 79)                  | 77 (48 - 117)           | 27 (0 - 69)                 | <.0001         | 108.9                   |

Variables with \* are continuous variables and presented as median (IQR); other variables are categorical variables and presented as count (percent). \*\* Annual IV tPA volume was calculated using 2003-2019 data, whereas annual EVT volume was calculated as the total number of EVT's administered in each site within 2018 Q3 - 2019 Q2 in the starting population. IS= Ischemic Stroke; EVT= Endovascular Therapy; UTD= Unable to Determine; CAD= Coronary Artery Disease; MI= Myocardial Infarction; PVD= Peripheral Vascular Disease; TIA= Transient Ischemic Attack; SBP= Systolic Blood Pressure; DBP= Diastolic Blood Pressure; BMI= Body Mass Index; EMS= Emergency Medical Services; NIHSS= NIH Stroke Scale.

**Table S2 Baseline characteristics by race/ethnicity**

| Variable                                                                       | Overall<br>N=42,422 | White<br>N=29,429 | Black<br>N=6,214 | Hispanic<br>N=2,887 | Asian<br>N=1,342 | Other<br>N=2,550 | P<br>Value | Standardized Differences: White<br>vs ... |          |       |       |
|--------------------------------------------------------------------------------|---------------------|-------------------|------------------|---------------------|------------------|------------------|------------|-------------------------------------------|----------|-------|-------|
|                                                                                |                     |                   |                  |                     |                  |                  |            | Black                                     | Hispanic | Asian | Other |
| Patient Demographics                                                           |                     |                   |                  |                     |                  |                  |            |                                           |          |       |       |
| Age*                                                                           | 72 (61 - 81)        | 74 (63 - 83)      | 64 (53 - 75)     | 70 (58 - 80)        | 72 (62 - 81)     | 70 (59 - 81)     | <.0001     | 58.3                                      | 22.0     | 9.3   | 18.8  |
| Female                                                                         | 21,634 (51.0)       | 15,081 (51.2)     | 3,148 (50.7)     | 1,411 (48.9)        | 707 (52.7)       | 1,287 (50.5)     | 0.0907     | 1.2                                       | 4.7      | 2.9   | 1.5   |
| Health Insurance Status                                                        |                     |                   |                  |                     |                  |                  |            |                                           |          |       |       |
| ' Private/VA/Champus/Other Insurance                                           | 16,904 (39.8)       | 12,400 (42.1)     | 2,232 (35.9)     | 845 (29.3)          | 524 (39.0)       | 903 (35.4)       | <.0001     | 45.2                                      | 53.2     | 43.2  | 31.5  |
| ' Medicaid                                                                     | 4,091 (9.6)         | 1,928 (6.6)       | 1,136 (18.3)     | 467 (16.2)          | 243 (18.1)       | 317 (12.4)       |            |                                           |          |       |       |
| ' Medicare                                                                     | 15,094 (35.6)       | 11,404 (38.8)     | 1,701 (27.4)     | 817 (28.3)          | 350 (26.1)       | 822 (32.2)       |            |                                           |          |       |       |
| ' Self Pay/No Insurance                                                        | 1,946 (4.6)         | 964 (3.3)         | 458 (7.4)        | 276 (9.6)           | 80 (6.0)         | 168 (6.6)        |            |                                           |          |       |       |
| Year of Stroke Admission                                                       |                     |                   |                  |                     |                  |                  |            |                                           |          |       |       |
| ' 2012                                                                         | 1,267 (3.0)         | 927 (3.1)         | 164 (2.6)        | 77 (2.7)            | 47 (3.5)         | 52 (2.0)         | <.0001     | 7.7                                       | 8.4      | 8.7   | 14.8  |
| ' 2013                                                                         | 1,835 (4.3)         | 1,330 (4.5)       | 229 (3.7)        | 147 (5.1)           | 57 (4.2)         | 72 (2.8)         |            |                                           |          |       |       |
| ' 2014                                                                         | 2,320 (5.5)         | 1,695 (5.8)       | 292 (4.7)        | 161 (5.6)           | 59 (4.4)         | 113 (4.4)        |            |                                           |          |       |       |
| ' 2015                                                                         | 4,715 (11.1)        | 3,285 (11.2)      | 698 (11.2)       | 302 (10.5)          | 145 (10.8)       | 285 (11.2)       |            |                                           |          |       |       |
| ' 2016                                                                         | 6,423 (15.1)        | 4,447 (15.1)      | 930 (15.0)       | 433 (15.0)          | 194 (14.5)       | 419 (16.4)       |            |                                           |          |       |       |
| ' 2017                                                                         | 8,875 (20.9)        | 6,182 (21.0)      | 1,363 (21.9)     | 542 (18.8)          | 281 (20.9)       | 507 (19.9)       |            |                                           |          |       |       |
| ' 2018                                                                         | 11,122 (26.2)       | 7,556 (25.7)      | 1,687 (27.1)     | 789 (27.3)          | 382 (28.5)       | 708 (27.8)       |            |                                           |          |       |       |
| ' 2019                                                                         | 5,865 (13.8)        | 4,007 (13.6)      | 851 (13.7)       | 436 (15.1)          | 177 (13.2)       | 394 (15.5)       |            |                                           |          |       |       |
| Medical History                                                                |                     |                   |                  |                     |                  |                  |            |                                           |          |       |       |
| Atrial Fibrillation/Flutter                                                    | 15,066 (35.5)       | 11,268 (38.3)     | 1,571 (25.3)     | 889 (30.8)          | 490 (36.5)       | 848 (33.3)       | <.0001     | 28.2                                      | 15.8     | 3.7   | 10.5  |
| Prosthetic Heart Valve                                                         | 916 (2.2)           | 666 (2.3)         | 107 (1.7)        | 70 (2.4)            | 23 (1.7)         | 50 (2.0)         | 0.0435     | 3.9                                       | 1.1      | 3.9   | 2.1   |
| Previous Stroke/TIA                                                            | 9,078 (21.4)        | 6,136 (20.9)      | 1,542 (24.8)     | 628 (21.8)          | 290 (21.6)       | 482 (18.9)       | <.0001     | 9.5                                       | 2.2      | 1.9   | 4.9   |
| CAD/Prior MI                                                                   | 10,134 (23.9)       | 7,428 (25.2)      | 1,334 (21.5)     | 620 (21.5)          | 235 (17.5)       | 517 (20.3)       | <.0001     | 8.9                                       | 8.9      | 18.9  | 11.9  |
| Carotid Stenosis                                                               | 1,079 (2.5)         | 882 (3.0)         | 85 (1.4)         | 43 (1.5)            | 16 (1.2)         | 53 (2.1)         | <.0001     | 11.2                                      | 10.2     | 12.6  | 5.8   |
| Diabetes Mellitus                                                              | 10,556 (24.9)       | 6,566 (22.3)      | 1,953 (31.4)     | 1,043 (36.1)        | 358 (26.7)       | 636 (24.9)       | <.0001     | 20.7                                      | 30.7     | 10.2  | 6.2   |
| Peripheral Vascular Disease (PVD)                                              | 1,556 (3.7)         | 1,181 (4.0)       | 207 (3.3)        | 94 (3.3)            | 19 (1.4)         | 55 (2.2)         | <.0001     | 3.6                                       | 4.0      | 16.0  | 10.8  |
| Hypertension                                                                   | 30,110 (71.0)       | 20,654 (70.2)     | 4,739 (76.3)     | 2,034 (70.5)        | 957 (71.3)       | 1,726 (67.7)     | <.0001     | 13.8                                      | 0.6      | 2.5   | 5.4   |
| Smoker                                                                         | 6,983 (16.5)        | 4,856 (16.5)      | 1,366 (22.0)     | 291 (10.1)          | 94 (7.0)         | 376 (14.7)       | <.0001     | 13.9                                      | 19.0     | 29.8  | 4.8   |
| Dyslipidemia                                                                   | 17,879 (42.1)       | 12,998 (44.2)     | 2,237 (36.0)     | 1,101 (38.1)        | 566 (42.2)       | 977 (38.3)       | <.0001     | 16.7                                      | 12.3     | 4.0   | 11.9  |
| Heart Failure                                                                  | 5,664 (13.4)        | 3,729 (12.7)      | 1,236 (19.9)     | 303 (10.5)          | 111 (8.3)        | 285 (11.2)       | <.0001     | 19.6                                      | 6.8      | 14.4  | 4.6   |
| Chronic Renal Insufficiency                                                    | 2,787 (6.6)         | 1,841 (6.3)       | 548 (8.8)        | 178 (6.2)           | 78 (5.8)         | 142 (5.6)        | <.0001     | 9.7                                       | 0.4      | 1.9   | 2.9   |
| Ambulatory status prior to the current event                                   |                     |                   |                  |                     |                  |                  |            |                                           |          |       |       |
| ' Able to ambulate independently (no help from another person) w/ or w/o devic | 30,193 (94.8)       | 21,143 (94.8)     | 4,399 (95.5)     | 1,978 (94.4)        | 944 (94.9)       | 1,729 (94.2)     | 0.0061     | 6.6                                       | 2.1      | 5.5   | 2.6   |
| ' With assistance (from person)                                                | 1,027 (3.2)         | 743 (3.3)         | 105 (2.3)        | 72 (3.4)            | 38 (3.8)         | 69 (3.8)         |            |                                           |          |       |       |
| ' Unable to ambulate                                                           | 627 (2.0)           | 428 (1.9)         | 102 (2.2)        | 46 (2.2)            | 13 (1.3)         | 38 (2.1)         |            |                                           |          |       |       |
| Arrival Information                                                            |                     |                   |                  |                     |                  |                  |            |                                           |          |       |       |
| Ambulatory status on Admission                                                 |                     |                   |                  |                     |                  |                  |            |                                           |          |       |       |
| ' Able to ambulate independently (no help from another person) w/ or w/o devic | 2,007 (8.8)         | 1,348 (8.4)       | 285 (9.3)        | 177 (10.9)          | 68 (9.3)         | 129 (9.9)        | 0.0189     | 4.0                                       | 8.4      | 3.8   | 6.0   |
| ' With assistance (from person)                                                | 3,602 (15.8)        | 2,563 (16.0)      | 458 (14.9)       | 253 (15.5)          | 110 (15.0)       | 218 (16.8)       |            |                                           |          |       |       |

| Variable                                                   | Overall<br>N=42,422 | White<br>N=29,429 | Black<br>N=6,214 | Hispanic<br>N=2,887 | Asian<br>N=1,342 | Other<br>N=2,550 | P<br>Value | Standardized Differences: White<br>vs ... |          |       |       |
|------------------------------------------------------------|---------------------|-------------------|------------------|---------------------|------------------|------------------|------------|-------------------------------------------|----------|-------|-------|
|                                                            |                     |                   |                  |                     |                  |                  |            | Black                                     | Hispanic | Asian | Other |
| ' Unable to ambulate                                       | 17,178 (75.4)       | 12,138 (75.6)     | 2,335 (75.9)     | 1,199 (73.6)        | 553 (75.6)       | 953 (73.3)       | <.0001     | 13.8                                      | 11.8     | 20.3  | 6.9   |
| Patient location when stroke symptoms discovered           |                     |                   |                  |                     |                  |                  |            |                                           |          |       |       |
| ' Not in a healthcare setting                              | 38,659 (91.9)       | 26,586 (91.1)     | 5,770 (93.6)     | 2,695 (93.8)        | 1,271 (95.4)     | 2,337 (92.3)     |            |                                           |          |       |       |
| ' Another acute care facility                              | 1,494 (3.6)         | 1,091 (3.7)       | 192 (3.1)        | 77 (2.7)            | 35 (2.6)         | 99 (3.9)         |            |                                           |          |       |       |
| ' Chronic health care facility                             | 1,542 (3.7)         | 1,252 (4.3)       | 126 (2.0)        | 72 (2.5)            | 16 (1.2)         | 76 (3.0)         | <.0001     | 11.2                                      | 12.8     | 12.9  | 19.9  |
| ' Outpatient healthcare setting                            | 384 (0.9)           | 250 (0.9)         | 75 (1.2)         | 28 (1.0)            | 10 (0.8)         | 21 (0.8)         |            |                                           |          |       |       |
| Arrival Mode: EMS                                          | 24,114 (56.9)       | 16,481 (56.1)     | 3,821 (61.6)     | 1,798 (62.4)        | 837 (62.4)       | 1,177 (46.2)     |            |                                           |          |       |       |
| Ambulatory Status at Admission                             |                     |                   |                  |                     |                  |                  |            |                                           |          |       |       |
| ' Able to ambulate independently                           | 2,007 (8.8)         | 1,348 (8.4)       | 285 (9.3)        | 177 (10.9)          | 68 (9.3)         | 129 (9.9)        | <.0001     | 9.9                                       | 16.4     | 17.7  | 12.9  |
| ' With assistance from person                              | 3,602 (15.8)        | 2,563 (16.0)      | 458 (14.9)       | 253 (15.5)          | 110 (15.0)       | 218 (16.8)       |            |                                           |          |       |       |
| ' Unable to ambulate                                       | 17,178 (75.4)       | 12,138 (75.6)     | 2,335 (75.9)     | 1,199 (73.6)        | 553 (75.6)       | 953 (73.3)       |            |                                           |          |       |       |
| Onset to Arrival Times, min*                               | 130 (56 - 215)      | 134 (59 - 215)    | 116 (50 - 210)   | 107 (48 - 200)      | 104 (47 - 203)   | 155 (65 - 231)   |            |                                           |          |       |       |
| Onset to Arrival Times, min, categories                    |                     |                   |                  |                     |                  |                  | <.0001     | 31.1                                      | 40.7     | 62.5  | 43.5  |
| ' <31                                                      | 2,989 (7.0)         | 1,901 (6.5)       | 541 (8.7)        | 284 (9.8)           | 115 (8.6)        | 148 (5.8)        | 0.6163     | 1.6                                       | 1.3      | 1.3   | 1.3   |
| ' >=31 and <61                                             | 8,728 (20.6)        | 5,768 (19.6)      | 1,434 (23.1)     | 719 (24.9)          | 359 (26.8)       | 448 (17.6)       |            |                                           |          |       |       |
| ' >=61 and <91                                             | 4,966 (11.7)        | 3,503 (11.9)      | 740 (11.9)       | 332 (11.5)          | 152 (11.3)       | 239 (9.4)        |            |                                           |          |       |       |
| ' >=91 and <121                                            | 3,467 (8.2)         | 2,537 (8.6)       | 472 (7.6)        | 199 (6.9)           | 92 (6.9)         | 167 (6.5)        |            |                                           |          |       |       |
| ' >=121 and <181                                           | 7,524 (17.7)        | 5,342 (18.2)      | 961 (15.5)       | 490 (17.0)          | 223 (16.6)       | 508 (19.9)       |            |                                           |          |       |       |
| ' >=181 and <241                                           | 6,975 (16.4)        | 4,967 (16.9)      | 950 (15.3)       | 392 (13.6)          | 194 (14.5)       | 472 (18.5)       |            |                                           |          |       |       |
| ' >=241                                                    | 7,773 (18.3)        | 5,411 (18.4)      | 1,116 (18.0)     | 471 (16.3)          | 207 (15.4)       | 568 (22.3)       |            |                                           |          |       |       |
| Off-Hour Arrival (Regular Hour: 7AM-6PM, M-F, non-holiday) | 23,878 (56.3)       | 16,548 (56.2)     | 3,544 (57.0)     | 1,605 (55.6)        | 763 (56.9)       | 1,418 (55.6)     |            |                                           |          |       |       |
| Initial NIHSS Score (0-42)*                                | 18 (13 - 22)        | 17 (13 - 22)      | 18 (13 - 22)     | 18 (13 - 23)        | 19 (13 - 23)     | 18 (13 - 23)     | <.0001     | 2.6                                       | 7.5      | 15.9  | 5.5   |
| Measurements                                               |                     |                   |                  |                     |                  |                  |            |                                           |          |       |       |
| Heart Rate (30-200), bpm*                                  | 80 (70 - 93)        | 80 (69 - 93)      | 82 (71 - 94)     | 81 (70 - 95)        | 79 (69 - 93)     | 80 (70 - 94)     | <.0001     | 6.4                                       | 7.4      | 0.8   | 1.2   |
| SBP (50-250), mm Hg*                                       | 148 (131 - 168)     | 148 (131 - 167)   | 149 (131 - 170)  | 149 (132 - 167)     | 148 (131 - 169)  | 147 (130 - 167)  | 0.0164     | 4.7                                       | 3.4      | 3.4   | 3.7   |
| DBP (20-200), mm Hg*                                       | 82 (71 - 95)        | 81 (71 - 94)      | 86 (74 - 99)     | 82 (71 - 95)        | 83 (72 - 95)     | 81 (70 - 93)     | <.0001     | 25.8                                      | 4.1      | 7.0   | 2.0   |
| BMI*                                                       | 28 (24 - 32)        | 28 (24 - 32)      | 29 (25 - 34)     | 28 (24 - 32)        | 25 (22 - 27)     | 28 (24 - 32)     | <.0001     | 13.8                                      | 0.7      | 64.6  | 1.6   |
| Medications Prior to Admission                             |                     |                   |                  |                     |                  |                  |            |                                           |          |       |       |
| Antiplatelets                                              | 15,828 (42.7)       | 11,580 (45.1)     | 2,095 (38.1)     | 903 (36.2)          | 422 (36.5)       | 828 (36.9)       | <.0001     | 14.4                                      | 18.3     | 17.6  | 16.8  |
| Anticoagulants                                             | 8,006 (26.7)        | 5,694 (28.0)      | 1,092 (23.8)     | 519 (24.0)          | 237 (23.7)       | 464 (24.3)       | <.0001     | 9.5                                       | 9.1      | 9.8   | 8.5   |
| Antihypertensives                                          | 24,057 (64.0)       | 16,972 (65.4)     | 3,528 (62.6)     | 1,522 (59.0)        | 729 (60.2)       | 1,306 (58.1)     | <.0001     | 5.9                                       | 13.4     | 10.8  | 15.0  |
| Cholesterol-Reducers                                       | 17,245 (40.7)       | 12,359 (42.0)     | 2,327 (37.5)     | 1,089 (37.8)        | 523 (39.1)       | 947 (37.2)       | <.0001     | 9.3                                       | 8.7      | 6.0   | 9.9   |
| Diabetic Medications                                       | 6,268 (17.6)        | 4,036 (16.5)      | 1,076 (20.0)     | 588 (24.0)          | 201 (17.4)       | 367 (17.3)       | <.0001     | 9.0                                       | 18.6     | 2.3   | 2.0   |
| Initial exam findings                                      |                     |                   |                  |                     |                  |                  |            |                                           |          |       |       |
| Weakness/Paresis                                           | 27,386 (93.1)       | 19,149 (93.6)     | 4,102 (92.4)     | 1,793 (93.1)        | 820 (88.7)       | 1,522 (91.4)     | <.0001     | 4.9                                       | 2.1      | 17.3  | 8.6   |
| Altered Level of Consciousness                             | 11,528 (39.2)       | 7,858 (38.4)      | 1,720 (38.7)     | 892 (46.3)          | 418 (45.2)       | 640 (38.4)       | <.0001     | 0.7                                       | 16.0     | 13.9  | 0.0   |
| Aphasia                                                    | 22,785 (77.5)       | 15,996 (78.2)     | 3,341 (75.2)     | 1,504 (78.1)        | 694 (75.1)       | 1,250 (75.0)     | <.0001     | 7.0                                       | 0.3      | 7.3   | 7.5   |
| Other neurological signs/symptoms                          | 13,026 (44.3)       | 9,045 (44.2)      | 2,030 (45.7)     | 887 (46.1)          | 366 (39.6)       | 698 (41.9)       | 0.0011     | 3.0                                       | 3.7      | 9.4   | 4.7   |
| No neurological signs/symptoms                             | 10 (0.0)            | 7 (0.0)           | 1 (0.0)          | 1 (0.1)             | 1 (0.1)          | 0 (0.0)          | 0.6593     | 0.7                                       | 0.9      | 2.8   | 2.6   |
| ND                                                         | 122 (0.4)           | 54 (0.3)          | 47 (1.1)         | 6 (0.3)             | 4 (0.4)          | 11 (0.7)         | <.0001     | 9.8                                       | 0.9      | 2.9   | 5.8   |

| Variable                            | Overall<br>N=42,422 | White<br>N=29,429 | Black<br>N=6,214 | Hispanic<br>N=2,887 | Asian<br>N=1,342 | Other<br>N=2,550 | P<br>Value | Standardized Differences: White<br>vs ... |          |       |       |
|-------------------------------------|---------------------|-------------------|------------------|---------------------|------------------|------------------|------------|-------------------------------------------|----------|-------|-------|
|                                     |                     |                   |                  |                     |                  |                  |            | Black                                     | Hispanic | Asian | Other |
| Reperfusion                         |                     |                   |                  |                     |                  |                  |            |                                           |          |       |       |
| IV t-PA initiated at this hospital? | 16,969 (40.0)       | 11,330 (38.5)     | 2,817 (45.3)     | 1,329 (46.1)        | 618 (46.1)       | 875 (34.3)       | <.0001     | 13.9                                      | 15.4     | 15.4  | 8.7   |
| IV t-PA at an outside hospital?     | 10,731 (37.3)       | 7,593 (37.7)      | 1,399 (34.6)     | 616 (33.3)          | 273 (32.5)       | 850 (46.0)       | <.0001     | 6.3                                       | 9.0      | 10.9  | 17.0  |
| Hospital Characteristics            |                     |                   |                  |                     |                  |                  |            |                                           |          |       |       |
| Number of Beds*                     | 557 (393 - 773)     | 554 (384 - 742)   | 648 (458 - 893)  | 539 (393 - 720)     | 458 (349 - 648)  | 595 (393 - 817)  | <.0001     | 28.7                                      | 3.0      | 29.2  | 10.1  |
| Rural Location                      | 138 (0.3)           | 128 (0.4)         | 2 (0.0)          | 1 (0.0)             | 1 (0.1)          | 6 (0.2)          | <.0001     | 8.4                                       | 8.3      | 7.2   | 3.5   |
| Stroke Center Status                |                     |                   |                  |                     |                  |                  | <.0001     | 19.7                                      | 12.2     | 9.4   | 14.5  |
| ' Comprehensive Stroke Center (CSC) | 17,893 (42.2)       | 12,055 (41.0)     | 3,122 (50.2)     | 1,017 (35.2)        | 581 (43.3)       | 1,118 (43.8)     |            |                                           |          |       |       |
| ' Primary Stroke Center (PSC)       | 18,756 (44.2)       | 13,448 (45.7)     | 2,280 (36.7)     | 1,476 (51.1)        | 554 (41.3)       | 998 (39.1)       |            |                                           |          |       |       |
| ' Neither CSC or PSC                | 5,773 (13.6)        | 3,926 (13.3)      | 812 (13.1)       | 394 (13.6)          | 207 (15.4)       | 434 (17.0)       |            |                                           |          |       |       |
| Academic Hospital                   | 38,848 (91.6)       | 26,798 (91.1)     | 5,839 (94.0)     | 2,640 (91.4)        | 1,194 (89.0)     | 2,377 (93.2)     | <.0001     | 11.1                                      | 1.4      | 7.0   | 8.0   |
| Region                              |                     |                   |                  |                     |                  |                  | <.0001     | 47.9                                      | 55.8     | 82.9  | 31.0  |
| ' Northeast                         | 8,887 (20.9)        | 6,322 (21.5)      | 1,038 (16.7)     | 452 (15.7)          | 282 (21.0)       | 793 (31.1)       |            |                                           |          |       |       |
| ' Midwest                           | 8,851 (20.9)        | 7,005 (23.8)      | 1,101 (17.7)     | 208 (7.2)           | 124 (9.2)        | 413 (16.2)       |            |                                           |          |       |       |
| ' South                             | 16,680 (39.3)       | 10,768 (36.6)     | 3,612 (58.1)     | 1,315 (45.5)        | 238 (17.7)       | 747 (29.3)       |            |                                           |          |       |       |
| ' West                              | 8,004 (18.9)        | 5,334 (18.1)      | 463 (7.5)        | 912 (31.6)          | 698 (52.0)       | 597 (23.4)       |            |                                           |          |       |       |
| Annual Volume of IS Admissions*     | 388 (276 - 528)     | 395 (281 - 528)   | 382 (284 - 541)  | 330 (241 - 468)     | 330 (255 - 443)  | 354 (276 - 503)  | <.0001     | 0.7                                       | 31.4     | 37.0  | 9.4   |
| Annual Volume of IV t-PA*           | 39 (28 - 53)        | 39 (28 - 52)      | 40 (28 - 57)     | 36 (28 - 54)        | 35 (29 - 48)     | 37 (28 - 50)     | <.0001     | 5.3                                       | 5.0      | 15.6  | 7.1   |
| Annual Volume of EVT*               | 77 (48 - 117)       | 76 (48 - 117)     | 85 (49 - 125)    | 74 (43 - 104)       | 68 (43 - 103)    | 84 (49 - 115)    | <.0001     | 12.4                                      | 8.6      | 22.4  | 4.3   |

**Table S3 Baseline characteristics missing rates and imputation details**

| Variable                                                 | Overall | EVT  | No EVT | Imputation Details                              |
|----------------------------------------------------------|---------|------|--------|-------------------------------------------------|
| <b>Patient Demographics</b>                              |         |      |        |                                                 |
| Age*                                                     | 0       | 0    | 0      | N/A                                             |
| Female                                                   | 0       | 0    | 0      | N/A                                             |
| Race/Ethnicity                                           | 0       | 0    | 0      | N/A                                             |
| Health Insurance Status                                  | 0       | 0    | 0      | N/A                                             |
| <b>Year of Stroke Admission</b>                          | 0       | 0    | 0      | N/A                                             |
| <b>Medical History</b>                                   | 0       | 0    | 0      | N/A                                             |
| Ambulatory status prior to the current event             | 29.2    | 24.9 | 29.9   | Missing/ND treated as a new category.           |
| <b>Arrival Information</b>                               |         |      |        |                                                 |
| Ambulatory status on Admission                           | 46.5    | 46.3 | 46.5   | Missing/ND treated as a new category.           |
| Patient location when stroke symptoms discovered         | 0.7     | 0.8  | 0.7    | Missing treated as Not in a healthcare setting. |
| Arrival Mode: EMS                                        | 1.7     | 0.2  | 2.0    | Missing treated as No.                          |
| Onset to Arrival Times, min*                             | 0       | 0    | 0      |                                                 |
| Off-Hour Arrival (Regular Hour: 7A-6P, M-F, non-holiday) | 0       | 0    | 0      | N/A                                             |
| Initial NIHSS Score (0-42)*                              | 0       | 0    | 0      | N/A                                             |
| <b>Measurements</b>                                      |         |      |        |                                                 |
| Heart Rate (30-200), bpm*                                | 28.4    | 21.9 | 29.5   |                                                 |
| SBP (50-250), mm Hg*                                     | 18.4    | 4.6  | 20.6   |                                                 |
| DBP (20-200), mm Hg*                                     | 18.2    | 4.5  | 20.4   |                                                 |
| BMI*                                                     | 36.9    | 32.4 | 37.6   |                                                 |
| <b>Medications Prior to Admission</b>                    |         |      |        |                                                 |
| Antiplatelets                                            | 12.1    | 12.6 | 12.0   | Missing/ND treated as a new category.           |
| Anticoagulants                                           | 40.0    | 29.3 | 41.8   | Missing/ND treated as a new category.           |
| Antihypertensives                                        | 16.8    | 11.3 | 17.7   |                                                 |
| Cholesterol-Reducers                                     | 0.3     | 0.1  | 0.3    |                                                 |
| Diabetic Medications                                     | 21.0    | 16.2 | 21.7   |                                                 |
| <b>Initial exam findings</b>                             | 33.0    | 30.7 | 33.3   | Added an indicator variable for missing/ND.     |
| <b>Reperfusion</b>                                       |         |      |        |                                                 |
| IV t-PA initiated at this hospital                       | 0.1     | 0.1  | 0.1    |                                                 |
| IV t-PA at an outside hospital?                          | 46.5    | 32.3 | 48.9   |                                                 |
| IV t-PA at this hospital or at an outside hospital       | 0.0     | 0.0  | 0.0    | Missing rate <.05, missing treated as No.       |
| <b>Hospital Characteristics</b>                          |         |      |        |                                                 |
| Number of Beds*                                          | 0       | 0    | 0      | N/A                                             |
| Rural Location                                           | 0       | 0    | 0      | N/A                                             |
| Stroke Center Status                                     | 0       | 0    | 0      | N/A                                             |
| Academic Hospital                                        | 0       | 0    | 0      | N/A                                             |
| Region                                                   | 0       | 0    | 0      | N/A                                             |
| Annual Volume of IS Admissions*                          | 0       | 0    | 0      | N/A                                             |
| Annual Volume of IV t-PA*                                | 0       | 0    | 0      | N/A                                             |
| Annual Volume of EVT*                                    | 0       | 0    | 0      | N/A                                             |

Note: shaded variables are model covariates.
